# Supplementary material for: PA-FGRS is a novel estimator of pedigree-based genetic liability that complements genotype-based inferences into the genetic architecture of major depressive disorder
Source: bioRxiv or medRxiv preprint supplement (doi:10.1101/2023.06.23.23291611), 2023-07-12
Supplement: Supplementary file [file media-2.pdf]

## Appendix

The Pearson-Aitken Family Genetic Risk Score (PA-FGRS) is a novel estimator for the expected genetic liability to disease carried by a proband given the pattern of diseases in an arbitrarily structured pedigree of relatives that may be only partially observed. This estimator is derived under a modified version of the liability threshold model for disease<sup>1</sup>. The method first estimates an initial liability for each relative and then uses the Pearson-Aitken selection formula to sequentially update the expected liability in the proband conditional on each relative.<sup>1,2</sup>

First, as outlined in the main text, we assume that a disease  $D_i$  is defined as:

$$D_i = \begin{cases} 1 & \text{if } L_i > t \\ 0 & \text{if } L_i < t \end{cases} \quad L_i = \sum_j \beta_j X_{ij} + e_i$$

Where  $L \sim N(0, 1)$  such that the prevalence in the population  $K_{pop}$  is given by the cumulative distribution function of the standard normal distribution  $K_{pop} = 1 - \Phi(T)$ .

However, if the disease has age of onset later than at birth, the observed disease status  $Y_i$  can be different from  $D_i$  (i.e.  $Y \leq D$ ), when an individual  $i$  has only been observed for a fraction of the risk window. We can express this as:

$$Y_i = \begin{cases} \text{Bernoulli}(\frac{K_i}{K_{pop}}) & \text{if } D_i = 1 \\ 0 & \text{if } D_i = 0 \end{cases} \quad (\text{Eq. S1})$$

Where  $K_i$  is the prevalence of the disease at age of individual  $i$  and  $K_{pop}$  is the population lifetime prevalence of the disease. Our aim is to estimate the expected liability of an individual given the observed disease status of a number of relatives and their age at the end of follow-up.

### Covariance matrix of liabilities

For an individual  $p$  with  $n$  relatives, we assume that the covariance matrix ( $\Sigma$ ) of the random vector of liabilities,  $L = [L_1, \dots, L_n, L_p, G_p]^T$ , is given by the heritability of the phenotype ( $h^2$ ) and the ( $n+2$  by  $n+2$ ) genetic relatedness matrix,  $r$ , such that:

$$\Sigma = \begin{bmatrix} 1 & \dots & r_{1,n}h^2 & r_{1,p}h^2 & r_{1,p}h^2 \\ \vdots & \ddots & \vdots & \vdots & \vdots \\ r_{n,1}h^2 & \dots & 1 & r_{n,p}h^2 & r_{n,p}h^2 \\ r_{p,1}h^2 & \dots & r_{p,n}h^2 & 1 & h^2 \\ r_{p,1}h^2 & \dots & r_{p,n}h^2 & h^2 & h^2 \end{bmatrix}$$

### Conditional liability distribution:

Let  $\mu^{i*}$  and  $\Omega^{i*}$  denote the expected mean vector and variance covariance matrix of  $L$  conditional on disease status of relatives 1, ...,  $i$ . Such that:

$$\begin{aligned}\mu_j^{i*} &= E(L_j | Y_1, \dots, Y_i, K_1, \dots, K_i, K_{pop}, \Sigma) \\ \Omega_{j,k}^{i*} &= Cov(L_j, L_k | Y_1, \dots, Y_i, K_1, \dots, K_i, K_{pop}, \Sigma)\end{aligned}$$

The algorithm we use to estimate genetic liability works by conditioning on each of the relatives in turn. We start by setting the  $\mu^{0*} = [0, \dots, 0]^T$  and  $\Omega^{0*} = \Sigma$ . Below we derive the necessary steps for estimating the conditional liabilities.

We assume that the posterior liability of the  $i^{th}$  individual is a mixture of two truncated normal distributions:

$$L_i | Y_1, \dots, Y_i, K_1, \dots, K_i, K_{pop}, \Sigma \sim (1 - \pi_i) \psi(\mu_i^{(i-1)*}, \Omega_{i,i}^{(i-1)*}, a = -\infty, b = T) + \pi_i \psi(\mu_i^{(i-1)*}, \Omega_{i,i}^{(i-1)*}, a = T, b = \infty) \quad (\text{Eq. S2})$$

where  $\psi(\mu, \sigma, a, b)$  denotes a truncated normal distribution with left-truncation at  $a$  and right-truncation at  $b$ .

Note that while this (Eq. S2) is strictly true for  $i = 1$ , it is only an approximation for  $i > 1$ , since the conditional distributions are no longer exactly Gaussian.<sup>3</sup> However, unless the disease is rare and the off-diagonal elements of  $\Sigma$  are high (which will only occur for high  $h^2$  in MZ-twins<sup>3</sup>) the deviation from normality is minor. We refer to this assumption as *conditional normality*.

### Deriving the mixture parameter

The mixture parameter  $\pi_i$  is given by the probability of being a case conditional on observed disease status of relatives 1 to  $i$ :  $\pi_i = P(D_i = 1 | Y_1, \dots, Y_{i-1}, Y_i = 1, K_1, \dots, K_i, K_{pop}, \Sigma)$ . In the case of  $Y_i = 1$  we have  $\pi_i = 1$ , whereas in the case  $Y_i = 0$ ,  $\pi_i$  is given by:

$$1 - \pi_i = P(D_i = 0 | Y_1, \dots, Y_{i-1}, Y_i = 0, K_1, \dots, K_i, K_{pop}, \Sigma)$$

by Bayes' theorem we have:

$$1 - \pi_i = \frac{P(D_i = 0 | Y_1, \dots, Y_{i-1}, K_1, \dots, K_i, K_{pop}, \Sigma) P(Y_i = 0 | D_i = 0, Y_1, \dots, Y_{i-1}, K_1, \dots, K_i, K_{pop}, \Sigma)}{P(Y_i = 0 | Y_1, \dots, Y_{i-1}, K_1, \dots, K_i, K_{pop}, \Sigma)}$$

and since  $P(Y_i = 0 | D_i = 0, Y_1, \dots, Y_{i-1}, Y_i = 0, K_1, \dots, K_i, K_{pop}, \Sigma) = 1$

$$1 - \pi_i = \frac{P(D_i=0|Y_1, \dots, Y_{i-1}, K_1, \dots, K_i, K_{pop}, \Sigma)}{P(Y_i=0|Y_1, \dots, Y_{i-1}, K_1, \dots, K_i, K_{pop}, \Sigma)}$$

From our assumption that  $P(Y_i = 1|D_i = 1)$  depends only on  $K_i$  and  $K_{pop}$  (Eq.S1), it follows that

$$P(Y_i = 1|D_i = 1, Y_1, \dots, Y_{i-1}, K_1, \dots, K_i, K_{pop}, \Sigma) = P(Y_i = 1|D_i = 1, K_i, K_{pop}) = \frac{K_i}{K_{pop}}.$$

We can use this and the law of total probability to split up the denominator:

$$\begin{aligned} 1 - \pi_i &= \frac{P(D_i=0|Y_1, \dots, Y_{i-1}, K_1, \dots, K_i, K_{pop}, \Sigma)}{P(D_i=0|Y_1, \dots, Y_{i-1}, K_1, \dots, K_i, K_{pop}, \Sigma) + \left(1 - \frac{K_i}{K_{pop}}\right) P(D_i=1|Y_1, \dots, Y_{i-1}, K_1, \dots, K_i, K_{pop}, \Sigma)} \\ &= \frac{P(L_i < T | \mu_i^{(i-1)*}, \Omega_{i,i}^{(i-1)*}, T)}{P(L_i < T | \mu_i^{(i-1)*}, \Omega_{i,i}^{(i-1)*}, T) + \frac{K_{pop} - K_i}{K_{pop}} P(L_i > T | \mu_i^{(i-1)*}, \Omega_{i,i}^{(i-1)*}, T)} \end{aligned}$$

assuming *conditional normality* we can replace the probabilities with the cumulative distribution function of the normal distribution:

$$1 - \pi_i \approx \frac{\Phi\left(\frac{T - \mu_i^{(i-1)*}}{\sqrt{\Omega_{i,i}^{(i-1)*}}}\right)}{\Phi\left(\frac{T - \mu_i^{(i-1)*}}{\sqrt{\Omega_{i,i}^{(i-1)*}}}\right) + \frac{K_{pop} - K_i}{K_{pop}} (1 - \Phi\left(\frac{T - \mu_i^{(i-1)*}}{\sqrt{\Omega_{i,i}^{(i-1)*}}}\right))} \quad (\text{Eq.S3})$$

### Expected liability conditional on disease status

Having derived the mixture parameter ( $\pi_i$ ), we can obtain the expected value  $L_i$  conditional on  $Y_1, \dots, Y_i$  and  $K_1, \dots, K_i$  as the expected value of the mixture distribution:

$$\mu_i^{i*} = E(L_i | Y_1, \dots, Y_i, K_1, \dots, K_i, K_{pop}, \Sigma) = \pi_i E(L_i | L_i > T, \mu_i, \Omega_{i,i}, T) + (1 - \pi_i) E(L_i | L_i < T, \mu_i, \Omega_{i,i}, T)$$

assuming *conditional normality*, and inserting the expected value of a truncated normal, this can be approximated by:

$$\mu_i^{i*} \approx \pi_i \left( \mu_i^{(i-1)*} + \sqrt{\Omega_{i,i}^{(i-1)*}} \frac{\phi(\lambda)}{1 - \Phi(\lambda)} \right) + (1 - \pi_i) \left( \mu_i^{(i-1)*} - \sqrt{\Omega_{i,i}^{(i-1)*}} \frac{\phi(\lambda)}{\Phi(\lambda)} \right) \quad (\text{Eq.S4})$$

where  $\lambda = \frac{T - \mu_i^{(i-1)*}}{\sqrt{\Omega_{i,i}^{(i-1)*}}}$  and with  $\phi$  and  $\Phi$  denoting the probability density function and the cumulative distribution function of the standard normal distribution.

### Expected variance conditional on disease status

The expected variance of  $L_i$  conditional on  $Y_1, \dots, Y_i$  and  $K_1, \dots, K_i$  is obtained as the expected variance of the mixture distribution which is given by:

$$\begin{aligned} \Omega_{i,i}^{i*} = \text{Var}(L_i | Y_1, \dots, Y_i, K_1, \dots, K_i, K_{pop}, \Sigma) = \\ \pi_i (E(L_i | L_i > T, \mu_i^{(i-1)*}, \Omega_{i,i}^{(i-1)*}, T)^2 + \text{Var}(L_i | L_i > T, \mu_i^{(i-1)*}, \Omega_{i,i}^{(i-1)*}, T)) + \\ (1 - \pi_i) (E(L_i | L_i < T, \mu_i^{(i-1)*}, \Omega_{i,i}^{(i-1)*}, T)^2 + \text{Var}(L_i | L_i < T, \mu_i^{(i-1)*}, \Omega_{i,i}^{(i-1)*}, T)) - \\ \left( \pi_i E(L_i | L_i > T, \mu_i^{(i-1)*}, \Omega_{i,i}^{(i-1)*}, T) + (1 - \pi_i) E(L_i | L_i < T, \mu_i^{(i-1)*}, \Omega_{i,i}^{(i-1)*}, T) \right)^2 \end{aligned}$$

assuming *conditional normality*, and inserting the expected variance of a the right and left truncated normal distribution, this can be approximated by:

$$\begin{aligned} \Omega_{i,i}^{i*} \approx \pi_i \left( \left( \mu_i^{(i-1)*} + \sqrt{\Omega_{i,i}^{(i-1)*}} \frac{\phi(\lambda)}{1 - \Phi(\lambda)} \right)^2 + \Omega_{i,i}^{(i-1)*} \left( 1 + \lambda \frac{\phi(\lambda)}{1 - \Phi(\lambda)} - \left( \frac{\phi(\lambda)}{1 - \Phi(\lambda)} \right)^2 \right) \right) + \\ (1 - \pi_i) \left( \left( \mu_i^{(i-1)*} - \sqrt{\Omega_{i,i}^{(i-1)*}} \frac{\phi(\lambda)}{\Phi(\lambda)} \right)^2 + \Omega_{i,i}^{(i-1)*} \left( 1 - \lambda \frac{\phi(\lambda)}{\Phi(\lambda)} - \left( \frac{\phi(\lambda)}{\Phi(\lambda)} \right)^2 \right) \right) - \\ \left( \pi_i \left( \mu_i^{(i-1)*} + \sqrt{\Omega_{i,i}^{(i-1)*}} \frac{\phi(\lambda)}{1 - \Phi(\lambda)} \right) + (1 - \pi_i) \left( \mu_i^{(i-1)*} - \sqrt{\Omega_{i,i}^{(i-1)*}} \frac{\phi(\lambda)}{\Phi(\lambda)} \right) \right)^2 \quad (\text{Eq.S5}) \end{aligned}$$

### Expected liability conditional on disease status of relatives

To obtain the conditional expectation and variance of the other liabilities, we use the Pearson-Aitken selection formula, which says that if, conditioning on  $Y_i$  and  $K_i$  changes the expected mean liabilities from  $\mu_i^{(i-1)*} = E(L_i | Y_1, \dots, Y_{i-1}, K_1, \dots, K_{i-1}, K_{pop}, \Sigma)$  to  $\mu_i^{i*} = E(L_i | Y_1, \dots, Y_i, K_1, \dots, K_i, K_{pop}, \Sigma)$ , it will change the vector of liabilities  $\mu$  to  $\mu^*$ , such that:

$$\mu^{i*} = \mu^{(i-1)*} + \Omega_{i,i}^{(i-1)*} \left( \Omega_{i,i}^{(i-1)*} \right)^{-1} (\mu_i^{i*} - \mu_i^{(i-1)*}) \quad (\text{Eq.S6})$$

Further if conditioning on  $Y_n$  and  $K_n$  changes the variance of liabilities from

$\Omega_{i,i}^{(i-1)*} = \text{Var}(L_i | Y_1, \dots, Y_{i-1}, K_1, \dots, K_{i-1}, K_{pop}, \Sigma)$  to  $\Omega_{i,i}^{i*} = \text{Var}(L_i | Y_1, \dots, Y_i, K_1, \dots, K_i, K_{pop}, \Sigma)$ , it will change the covariance matrix,  $\Omega$ , to

$$\Omega^{i*} = \Omega^{(i-1)*} - \Omega_{i,i}^{(i-1)*} \left( \left( \Omega_{i,i}^{(i-1)*} \right)^{-1} - \left( \Omega_{i,i}^{(i-1)*} \right)^{-1} \Omega_{i,i}^{i*} \left( \Omega_{i,i}^{(i-1)*} \right)^{-1} \right) \Omega_{i,i}^{(i-1)*} \quad (\text{Eq.S7})$$

### Example

For an individual (3) with two family members (1 and 2) of which one is affected ( $Y_1 = 1$ ) and the other is unaffected ( $Y_2 = 0$ ) we can calculate the expected liability of individual 3,

$E(G_3 | Y_1 = 1, Y_2 = 0, K_1, K_2, K_{pop}, \Sigma)$ , by the following procedure:

We start by setting the vector of liabilities,

$$\mu^{0*} = [E(L_1), E(L_2), E(G_3)]^T = [0, 0, 0]^T$$

with covariance matrix

$$\Omega^{0*} = \Sigma = \begin{bmatrix} \text{Var}(L_1) & \text{Cov}(L_1, L_2) & \text{Cov}(L_1, G_3) \\ \text{Cov}(L_2, L_1) & \text{Var}(L_2) & \text{Cov}(L_2, G_3) \\ \text{Cov}(G_3, L_1) & \text{Cov}(G_3, L_2) & \text{Var}(G_3) \end{bmatrix} = \begin{bmatrix} 1 & r_{1,2}h^2 & r_{1,3}h^2 \\ r_{2,1}h^2 & 1 & r_{2,3}h^2 \\ r_{3,1}h^2 & r_{3,2}h^2 & h^2 \end{bmatrix}$$

Next, we obtain the expected liability of relative 1, conditional on that individual being a case, (Eq.S4):

$$\mu_1^{1*} = E(L_1 | Y_1 = 1, K_1, K_{pop}, \Sigma) = \pi_1(\mu_1^{0*} + \sqrt{\Omega_{1,1}^{0*}} \frac{\phi(\lambda)}{1-\Phi(\lambda)}) + (1 - \pi_1)(\mu_1^{0*} - \sqrt{\Omega_{1,1}^{0*}} \frac{\phi(\lambda)}{\Phi(\lambda)})$$

where since  $\lambda = \frac{T - \mu_1^{0*}}{\sqrt{\Omega_{1,1}^{0*}}} = T$  and  $\pi_1 = P(D_1 = 1 | Y_1 = 1, K_1, K_{pop}, \Sigma) = 1$ , this simplifies to:

$$E(L_1 | Y_1 = 1, K_1, K_{pop}, \Sigma) = \frac{\phi(\lambda)}{1-\Phi(\lambda)} = \frac{\phi(T)}{1-\Phi(T)}$$

And the expected variance:

$$\begin{aligned} \text{Var}(L_1 | Y_1 = 1, K_1, K_{pop}, \Sigma) &\approx \pi_1 \left( \left( \mu_1^{0*} + \sqrt{\Omega_{1,1}^{0*}} \frac{\phi(\lambda)}{1-\Phi(\lambda)} \right)^2 + \Omega_{1,1}^{0*} \left( 1 + \lambda \frac{\phi(\lambda)}{1-\Phi(\lambda)} - \left( \frac{\phi(\lambda)}{1-\Phi(\lambda)} \right)^2 \right) \right) + \\ &(1 - \pi_1) \left( \left( \mu_1^{0*} - \sqrt{\Omega_{1,1}^{0*}} \frac{\phi(\lambda)}{\Phi(\lambda)} \right)^2 + \Omega_{1,1}^{0*} \left( 1 - \lambda \frac{\phi(\lambda)}{\Phi(\lambda)} - \left( \frac{\phi(\lambda)}{\Phi(\lambda)} \right)^2 \right) \right) - \\ &\left( \pi_1 \left( \mu_1^{0*} + \sqrt{\Omega_{1,1}^{0*}} \frac{\phi(\lambda)}{1-\Phi(\lambda)} \right) + (1 - \pi_1) \left( \mu_1^{0*} - \sqrt{\Omega_{1,1}^{0*}} \frac{\phi(\lambda)}{\Phi(\lambda)} \right) \right)^2 = \\ &\left( \left( \frac{\phi(T)}{1-\Phi(T)} \right)^2 + \left( 1 + T \left( \frac{\phi(T)}{1-\Phi(T)} \right) - \left( \frac{\phi(T)}{1-\Phi(T)} \right)^2 \right) \right) - \left( \frac{\phi(T)}{1-\Phi(T)} \right)^2 = \\ &1 + T \left( \frac{\phi(T)}{1-\Phi(T)} \right) - \left( \frac{\phi(T)}{1-\Phi(T)} \right)^2 \end{aligned}$$

Now we update the vector of liabilities (Eq.S6):

$$\mu^{1*} = \mu^{0*} + \Sigma_{,1} \Sigma_{1,1}^{-1} (\mu_1^{1*} - \mu_1^{0*}) = [0, 0, 0]^T + \Sigma_{,1} \Sigma_{1,1}^{-1} \frac{\phi(T)}{1-\Phi(T)} = \Sigma_{,1} \frac{\phi(T)}{1-\Phi(T)}$$

And the covariance matrix (Eq.S7):

$$\Omega^{1*} = \Omega^{0*} - \Omega_{,1}^{0*} \left( \left( \Omega_{1,1}^{0*} \right)^{-1} - \left( \Omega_{1,1}^{0*} \right)^{-1} \Omega_{1,1}^{1*} \left( \Omega_{1,1}^{0*} \right)^{-1} \right) \Omega_{,1}^{0*} = \Sigma - \Sigma_{,1} \left( \left( \frac{\phi(T)}{1-\Phi(T)} \right)^2 - \frac{T\phi(T)}{1-\Phi(T)} \right) \Sigma_{,1}$$

Having obtained the estimated liability conditional on the status of the first relative, we now condition on the status of the second relative, to estimate  $\mu^{2*}$  and  $\Omega^{2*}$ .

First, the expected liability of relative 2 is:

$$\mu_2^{2*} = E(L_2 | Y_1 = 1, Y_2 = 0, K_1, K_2, K_{pop}, \Sigma) = \pi_2 \left( \mu_2^{1*} + \sqrt{\Omega_{2,2}^{1*}} \frac{\phi(\lambda)}{1-\Phi(\lambda)} \right) + (1 - \pi_2) \left( \mu_2^{1*} - \sqrt{\Omega_{2,2}^{1*}} \frac{\phi(\lambda)}{\Phi(\lambda)} \right)$$

where  $\lambda = \frac{T-\mu_2^{1*}}{\sqrt{\Omega_{2,2}^{1*}}}$  and  $\pi_2 = P(D_2 = 1 | Y_1 = 1, Y_2 = 0, K_1, K_2, K_{pop}, \Sigma)$  which is obtained by

(Eq.S3):

$$\pi_2 = 1 - \frac{\Phi\left(\frac{T-\mu_2^{1*}}{\sqrt{\Omega_{2,2}^{1*}}}\right)}{\Phi\left(\frac{T-\mu_2^{1*}}{\sqrt{\Omega_{2,2}^{1*}}}\right) + \frac{K_{pop}-K_2}{K_{pop}} \left(1 - \Phi\left(\frac{T-\mu_2^{1*}}{\sqrt{\Omega_{2,2}^{1*}}}\right)\right)}$$

the conditional variance of the liability of relative 2 is:

$$\begin{aligned} \Omega_{2,2}^{2*} = \text{Var}(L_2 | Y_1 = 1, Y_2 = 0, K_1, K_2, K_{pop}, \Sigma) \approx & \pi_2 \left( \left( \mu_2^{1*} + \sqrt{\Omega_{2,2}^{1*}} \frac{\phi(\lambda)}{1-\Phi(\lambda)} \right)^2 + \Omega_{2,2}^{1*} \left( 1 + \lambda \frac{\phi(\lambda)}{1-\Phi(\lambda)} - \left( \frac{\phi(\lambda)}{1-\Phi(\lambda)} \right)^2 \right) \right) \\ & (1 - \pi_2) \left( \left( \mu_2^{1*} - \sqrt{\Omega_{2,2}^{1*}} \frac{\phi(\lambda)}{\Phi(\lambda)} \right)^2 + \Omega_{2,2}^{1*} \left( 1 - \lambda \frac{\phi(\lambda)}{\Phi(\lambda)} - \left( \frac{\phi(\lambda)}{\Phi(\lambda)} \right)^2 \right) \right) - \\ & \left( \pi_2 \left( \mu_2^{1*} + \sqrt{\Omega_{2,2}^{1*}} \frac{\phi(\lambda)}{1-\Phi(\lambda)} \right) + (1 - \pi_2) \left( \mu_2^{1*} - \sqrt{\Omega_{2,2}^{1*}} \frac{\phi(\lambda)}{\Phi(\lambda)} \right) \right)^2 \end{aligned}$$

Again we update the vector of liabilities (Eq.S6):

$$\mu^{2*} = \mu^{1*} + \Omega_{,2}^{1*} \left( \Omega_{2,2}^{1*} \right)^{-1} (\mu_2^{2*} - \mu_2^{1*})$$

And the covariance matrix (Eq.S7):

$$\Omega^{2*} = \Omega^{1*} - \Omega_{,2}^{1*} \left( \left( \Omega_{2,2}^{1*} \right)^{-1} - \left( \Omega_{2,2}^{1*} \right)^{-1} \Omega_{2,2}^{2*} \left( \Omega_{2,2}^{1*} \right)^{-1} \right) \Omega_{,2}^{1*}$$

The third element of  $\mu^{2*}$  contains our estimate of  $E(G_3|Y_1 = 1, Y_2 = 0, K_1, K_2, K_{pop}, \Sigma)$  i.e. the estimated liability of individual 3, and the third diagonal element of  $\Omega^{3*}$  is its variance  $\text{Var}(G_3|Y_1 = 1, Y_2 = 0, K_1, K_2, K_{pop}, \Sigma)$ .

### Supplementary References

1. Falconer, D. S. The inheritance of liability to certain diseases, estimated from the incidence among relatives. *Ann. Hum. Genet.* **29**, 51–76 (1965).
2. Fisher, R. A. XV.—The Correlation between Relatives on the Supposition of Mendelian Inheritance. *Trans. R. Soc. Edinb.* **52**, 399–433 (1918).
3. So, H.-C., Kwan, J. S. H., Cherny, S. S. & Sham, P. C. Risk prediction of complex diseases from family history and known susceptibility loci, with applications for cancer screening. *Am. J. Hum. Genet.* **88**, 548–565 (2011).
